# Supplementary material
Source: Research Square preprint supplement (doi:10.21203/rs.3.rs-9785870/v1)
Supplement: Supplementary file 1 [file 2077f440906657c1dbd4905d.docx]

Table S1. PCR primers for the amplification of the mitochondrial genomes of *Lycodes* sp.1 – sp.5.

| Primer name | Primer Sequences (5’–3’) | Annealing temperature (Co) |
| --- | --- | --- |
| Lyc_1131F | GCAAGTATCCGCACTCCTGT | 60.1 |
| AJG20* | AACTCAGCAGTGATAAACATT | 51.7 |
| AJG15* | TAGGGCCTCTCGTATAACCG | 58.1 |
| Lsp_502F | CCCCACTATGCCTAGCCCTA | 60.2 |
| Lyc_1623R | GGGTTTAAAGCACCGCCAAG | 60.0 |
| Lyc_1931F | CCCCAAGCCCACCAACTTAA | 60.2 |
| Lsp_1223R | TTTCTCTATTGCGCCGAGGG | 60.2 |
| Lyc_2591F | CCCGTCTCTGTGGCAAAAGA | 60.3 |
| Lsp_1579F | GGTACAGCCCCTTTGAACCA | 59.9 |
| Lsp_1982F | GGAACTCGGCAAACACACAC | 60.0 |
| Lyc_3189R | GTGTGTGTTTGCCGAGTTCC | 60.0 |
| Lyc_3290R | TCAAAATACCGCGGCCGTTA | 60.4 |
| 2506_F | CCTAATGTCTTTGGTTGGGG | 56.0 |
| Lsp_2373R | TCCACGTGGGGGTTTTTCAA | 60.0 |
| Lsp_2518R | CCCCTTGTCGATATGGGCTC | 60.0 |
| AJG17* | ACCTCGATGTTGGATCAGG | 56.5 |
| AJG21* | AGATAGAAACTGACCTGGATT | 53.6 |
| Lsp_3080F | TTCCTACTGGCCCCTATGCT | 60.0 |
| Lyc_4532F | GGCTTTACCCTGCAGACCTT | 60.0 |
| Lsp_3768F | TGGTTGTCTGACATCTCGCC | 60.0 |
| Lsp_3829R | GTGTTACACTTGCGGGGGTA | 60.0 |
| Lsp_3920R | GGTTCGAGCCCCTTCTTTCT | 59.7 |
| 4177_F | TTAAGCTTTTGGGCCCATAC | 56.0 |
| Lsp_3999F | CATACCCCAGGCATGTTGGT | 60.0 |
| Lsp_4467R | GTATGAGCAGGGCAAAGGGT | 60.0 |
| Lsp_4513R | GTGAGCCCCAGGATAACGAG | 59.9 |
| Lyc_6077R | GCTAATGCGGCTAGTGTTGC | 60.0 |
| Lyc_6173F | TTCCACCCTCACAACTCACG | 59.9 |
| 5331_R | CCCGCTTAGGGCTTTGAAGGC | 63.9 |
| COI-FishF1** | TCAACCAACCACAAAGACATTGGCAC | 64.7 |
| Lyc_6917R | GGGTACGAGCCAGTTTCCAA | 60.0 |
| Lsp_L_6374_F | CACACGCGCCTACTTCACATCTG | 64.1 |
| Lsp_6620F | CATGGGGGCTGTCTTTGCTA | 60.0 |
| Lsp_6684_F | ACCCTCCACAGCACTTGAAC | 60.2 |
| Lsp_Las_6864_F | TGGTGGCAGTAATTATGTTCCTAT | 57.7 |
| 7291F_mod | AACCRCTCTGYCACTTTCTT | 54.4 – 60.2 |
| Lsp_L_7134_F | CGAGGCAGCGTTGTGGGTTAGACT | 66.9 |
| Lsp_L_7173_R | TTGCAAAACACGCGGGAGTCTAAC | 64.3 |
| Lsp_7195F | GCCCATCCCTCACAGTTAGG | 59.8 |
| Lsp_7407R | AATGATTGCTGGGAGGACGG | 60.1 |
| Lsp_L_7591_R | GGAATTGGCCGGGGGTTAGGT | 64.5 |
| Lsp_Las_7639_R | GATGGGGGATTCTACGGGGATTAC | 62.1 |
| Lsp_7767F | CTACGGCCAGTGCTCTGAAA | 60.0 |
| 8127_R | CTTTAGCTTAAAAGGCTAACGCT | 57.5 |
| AJG5* | CTAGTGACATGCCCCAACTCAACC | 63.4 |
| Lsp_7971R | TTGAGTTGAGGCATGTCGCT | 60.0 |
| Lsp_L_8176_R | CCATTAAAGGCACCCCCAGAT | 60.1 |
| Lsp_8388F | TACTTTTACGCCCACCACCC | 60.0 |
| Lsp_8448_R | CGGTTGCAAGTCATAGGGGT | 60.0 |
| Lsp_8596R | GCTGTTAGTCGAACCCCCAA | 60.0 |
| Lsp_9033F | CTCCGCTATGGCATGGTTCT | 59.9 |
| Lsp_9177R | AGGGGTCAAGTGCAGTGATG | 60.0 |
| Lsp_9202R | CGCTGTATTAAGCAGGGGCA | 60.5 |
| Lyc_10760F | ATCGGCTCTTCATTCCTGGC | 60.2 |
| Lyc_10964R | ACCGGGTGATTGGAAGTCAC | 60.0 |
| Lsp_9617F | AATCACCCGGCCTTGGTTAG | 60.0 |
| Lsp_9764R | AGGGTGAGAGCTTTTCGTGG | 60.0 |
| Lsp_10244F | CGCCCCTATGCTCCTGTTAG | 60.0 |
| Lsp_10407R | AGGCGGTGGGTACTAGCATA | 60.1 |
| Lsp_10556F | GTCCTCACCTGCTGATTGCT | 60.0 |
| Lsp_10646F | ACCCTGTTAACGTCCCTTCA | 58.6 |
| Lyc12196R | AGGAGGGCAACTAGNAGNGG | 57.5 – 64.4 |
| Lsp_10915R | GGGGTCCGTGTATTGGAGTG | 60.1 |
| tRNA-Ser-F | CCACCRAGAGAGGCTCGCCA | 64.3 – 66.2 |
| AJG11* | AACAGCTCATCCATTGGTCTTAGG | 60.6 |
| Lsp_12030R | AAGGGTTGAGAGTACGGGGT | 60.2 |
| Lsp_12149R | ATCGTCTCTGTGCCTTCGTT | 59.4 |
| Lsp_12551F | ACTCTTGGGAGATGCAGCAG | 59.7 |
| ND5_837-F | TCTGCCCTACTACACTCCAGCAC | 63.6 |
| 12944R | TGCTGGAGTGTAGTAGGGCA | 60.3 |
| Lsp_13061F | CATCACCTCACCCCCTTCAC | 60.0 |
| Lyc_14389F | CCTTACCCTCCTAGCCACCT | 60.0 |
| Lsp_13223R | AGGTGGCTAGGAGGGTAAGG | 60.0 |
| Lsp_13646F | TGAATCGAGAAGGTTGGCCC | 60.0 |
| Lsp_13727R | GCCCTTGTTGCGTGTTACTG | 60.0 |
| ND6-2050-F | ACCACCCCCCTCACACCGCAC | 69.1 |
| ND6-2050-R | GTGCGGTGTGAGGGGGGTGGT | 69.1 |
| Lsp_14222R | GGTTAGTAGTCGTAGCGGGC | 60.0 |
| AJG13* | TGAARACCACCGTTGTTATTCAA | 57.4 – 58.5 |
| tRNA-Glu-R3 | CAACGGTGGTTTTTCAAGCCATTAGT | 62.8 |
| Lyc_15759R | AGGCAGTTGCGATATCGGAG | 60.0 |
| Lyc_16562F | AAACGTCGCCATCCTCACAT | 60.0 |
| THR-Fish2-R*** | AACCTCCGACATCCGGCTTACAAGACCG | 69.8 |
| Lyc_D-loop-184F | ACTATTCTTTGCGCGTATGT | 55.6 |
| Lyc_17062R | TGATGATATATGAGGGGGTTACTACT | 58.3 |
| Lyc_D-loop-4xx-F | GATGTAGTAAGAACCGACCA | 54.2 |
| Lyc_D-loop-4xx-R | TGGTCGGTTCTTACTACATC | 54.2 |
| D-loop_in_R2 | TATGTAAGCGTCGATGAAAGTGC | 59.5 |
| D-loop_in_F2 | TGACATAACAGAGCGCACACGGT | 64.8 |
| Lyc_D-loop-883R | AACAAGCACTATTTATGCTCTTG | 55.6 |
| Lyc_16622F | CCCCGGAAACAGGAAAACCT | 60.2 |
| Marinefish_Dloop_Phe-R**** | GGGCTCATCTTAACATCTTCA | 55.4 |

* Gharrett A. J., Gray A.K., Brykov V.A. "Phylogeographic analysis of mitochondrial DNA variation in Alaskan coho salmon, Oncorhynchus kisutch." Fishery Bulletin, vol. 99, no. 4, Oct. 2001, pp. 528-544.

** Ward R.D., Zemlak T.S., Innes B.H., Last P.R., Hebert P.D.N. “DNA barcoding Australia's fish species.” Philos Trans R Soc Lond B Biol Sci. 2005 Oct 29;360(1462):1847-57. doi: 10.1098/rstb.2005.1716.

*** Sevilla R.G., Diez A., Norén M., Mouchel O., Jérôme M., Verrez-Bagnis V., Van Pelt H., Favre-Krey L., Krey G., Consortium T.F. and Bautista J.M. (2007), Primers and polymerase chain reaction conditions for DNA barcoding teleost fish based on the mitochondrial cytochrome b and nuclear rhodopsin genes. Molecular Ecology Notes, 7: 730-734. https://doi.org/10.1111/j.1471-8286.2007.01863.x

**** Cheng Y.-Z., Xu T.-J., Jin X.-X., Tang D., Wei T., Sun Y.-Y., Meng F.-Q., Shi G., and Wang R.-X. (2012). Universal primers for amplifica-tion of the complete mitochondrial control region in marine fish species. Molecular Biology 46(5), 727–730. doi:10.1134/S0026893312040024
