# Supplementary material
Source: Research Square preprint supplement (doi:10.21203/rs.3.rs-9785870/v1)

Graphical representation of primer binding sites (from Table S1) on mtDNA Lsp2-11 (MW691098).


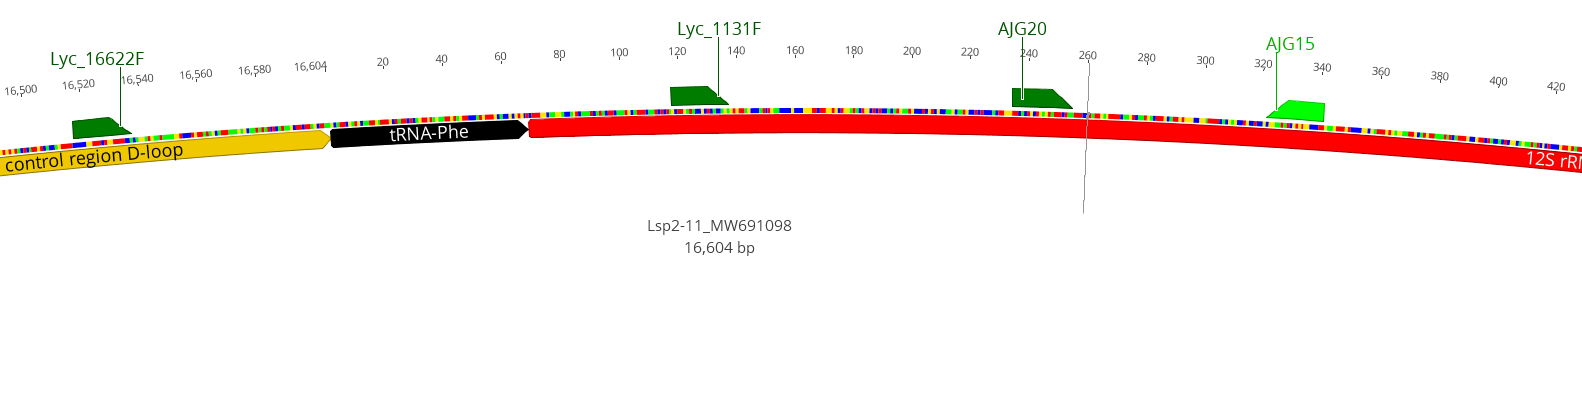


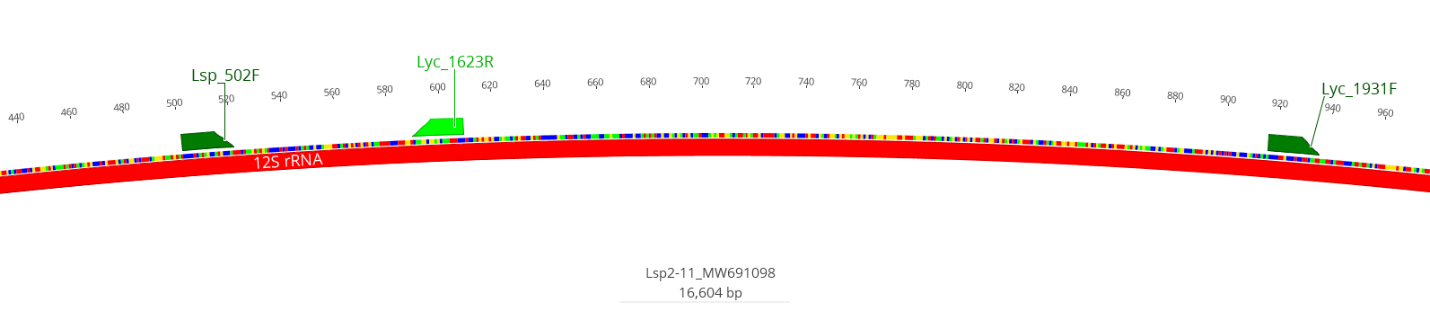


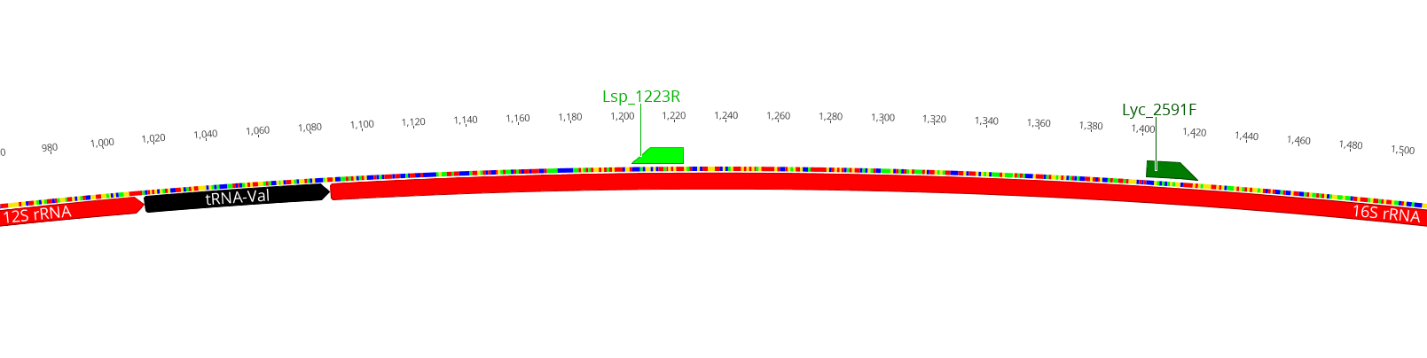


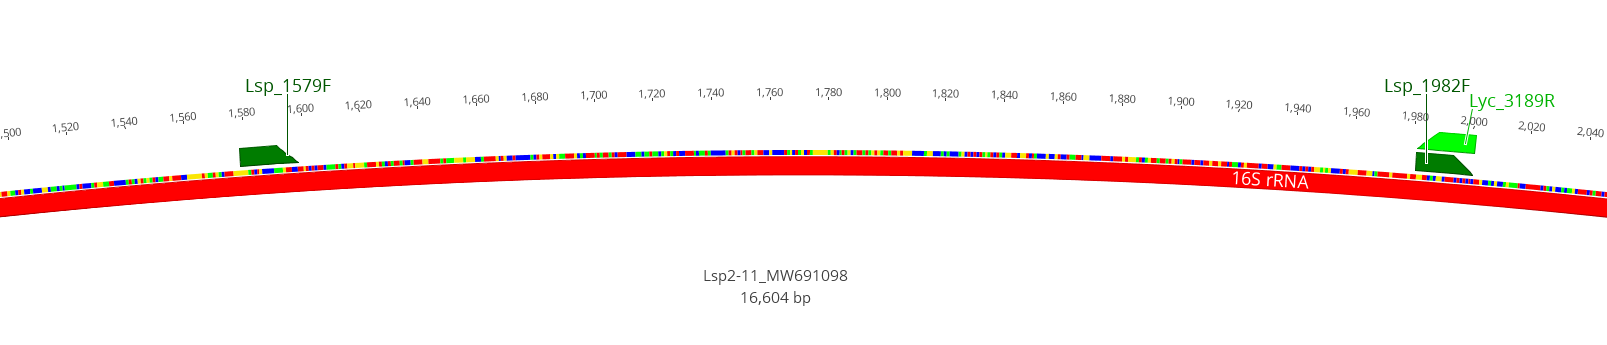


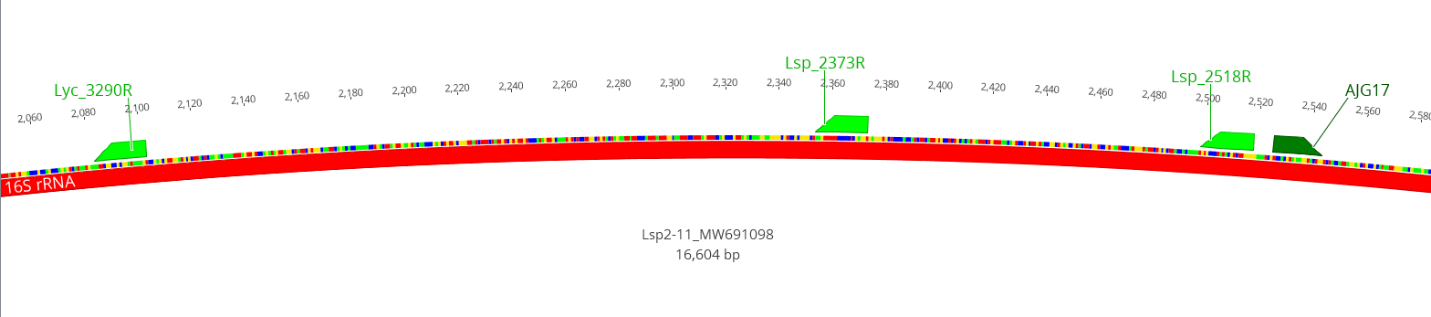


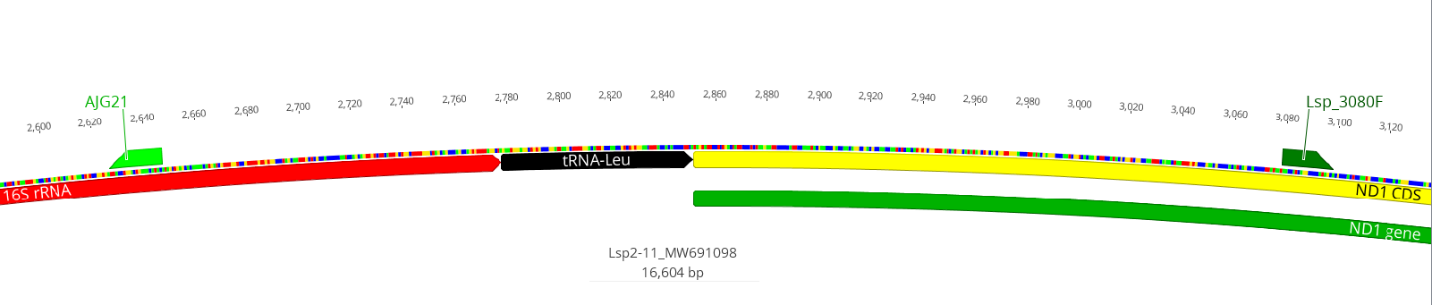


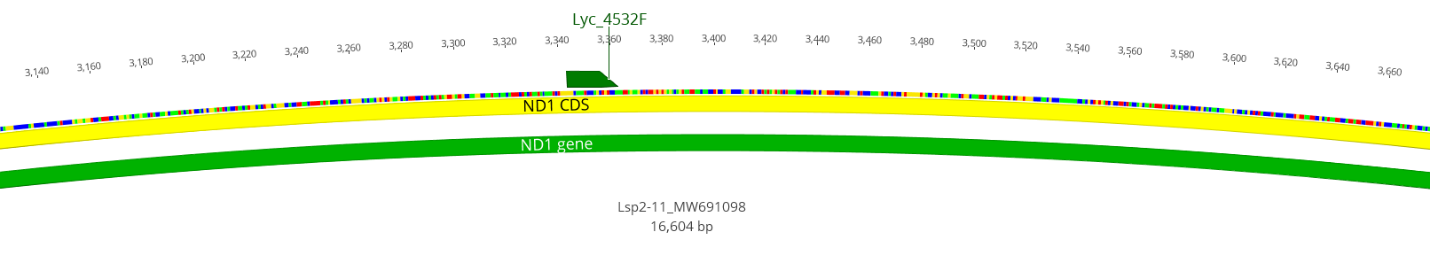


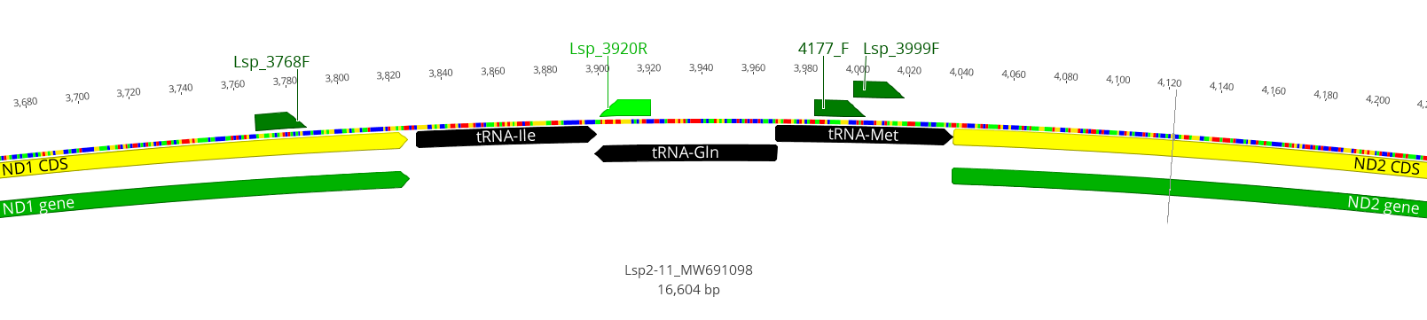


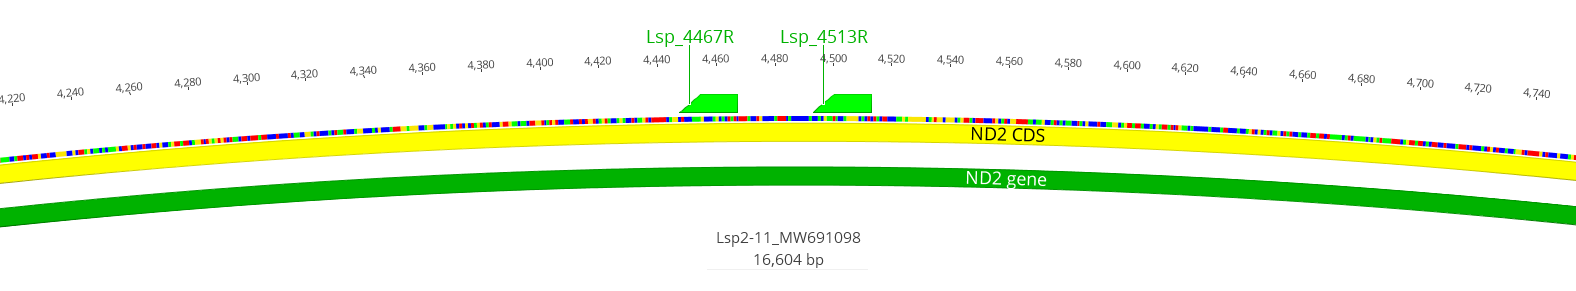


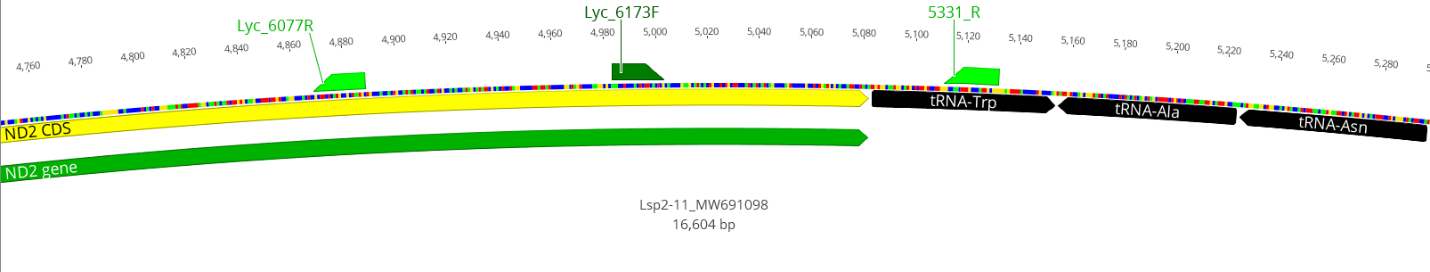


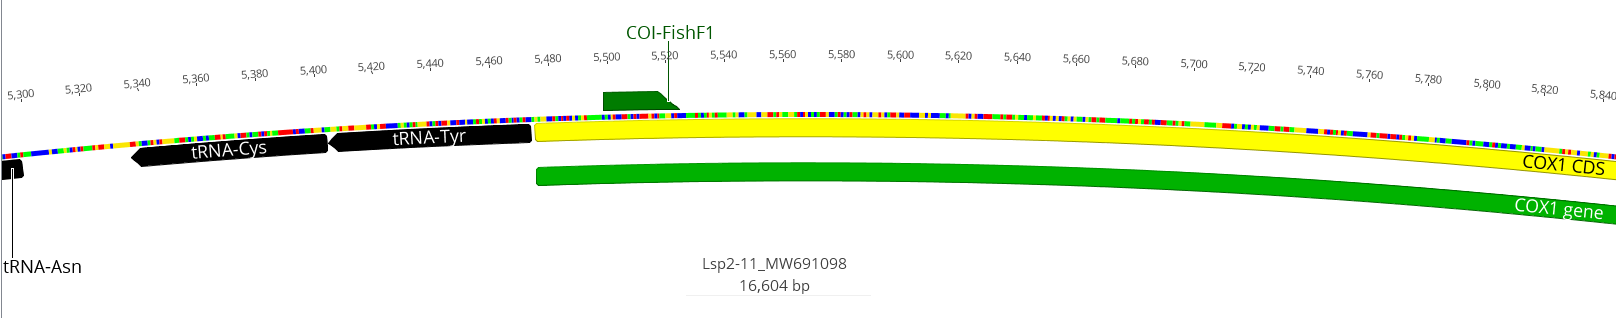


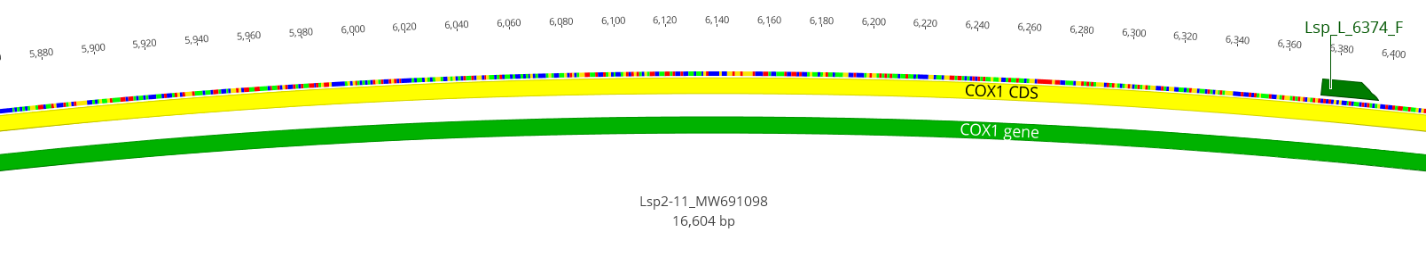


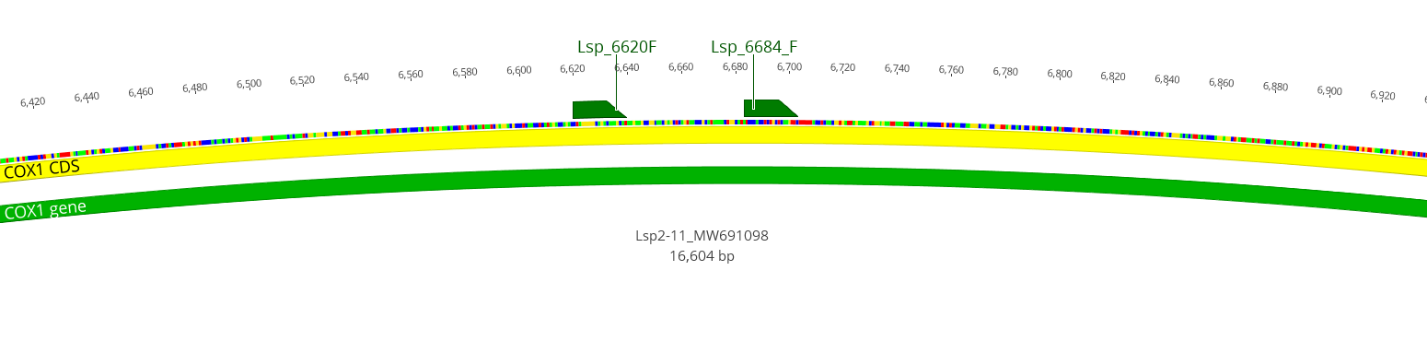


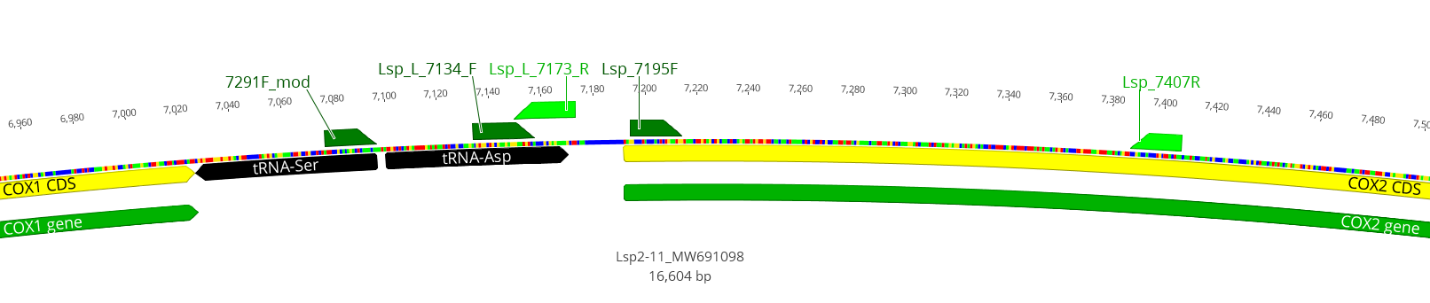


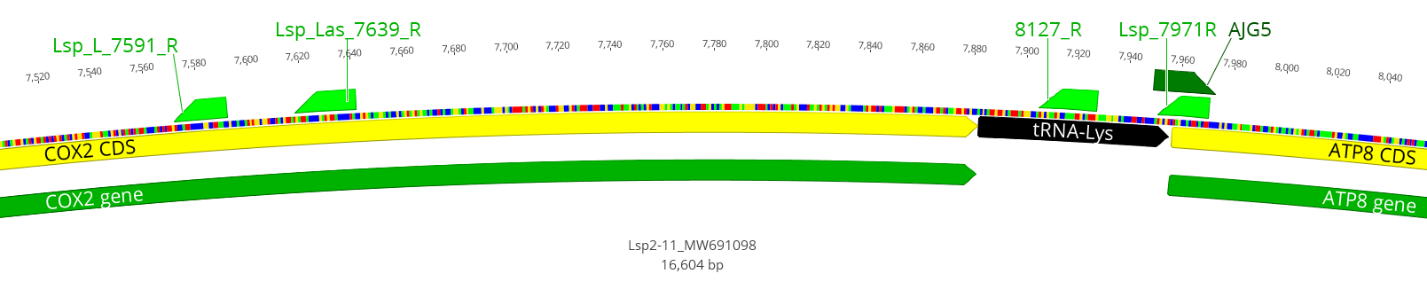


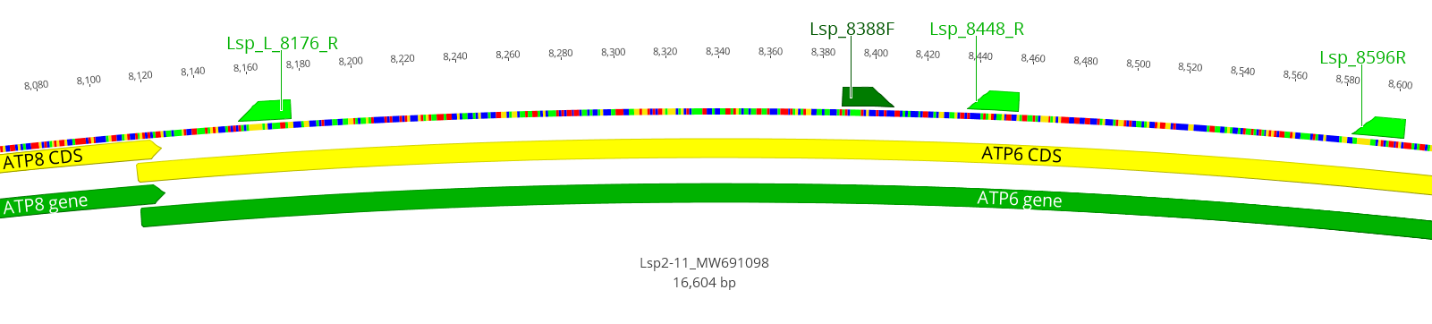


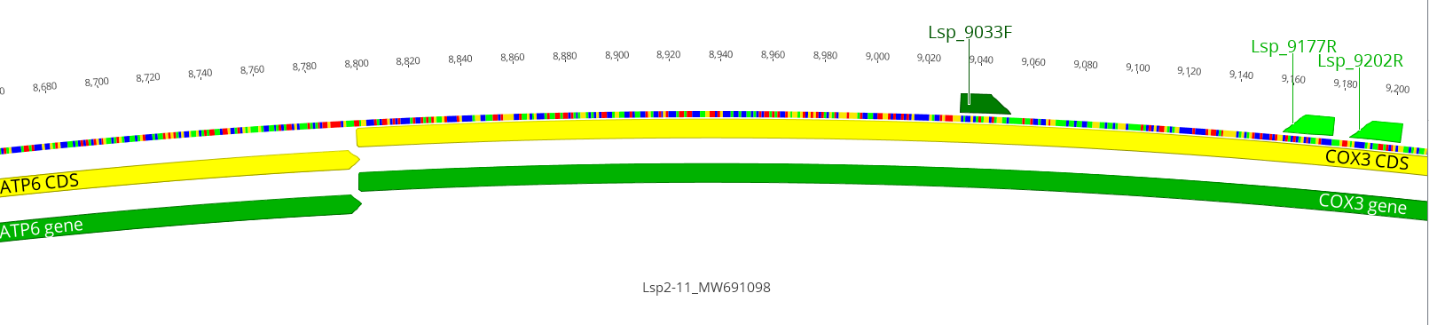


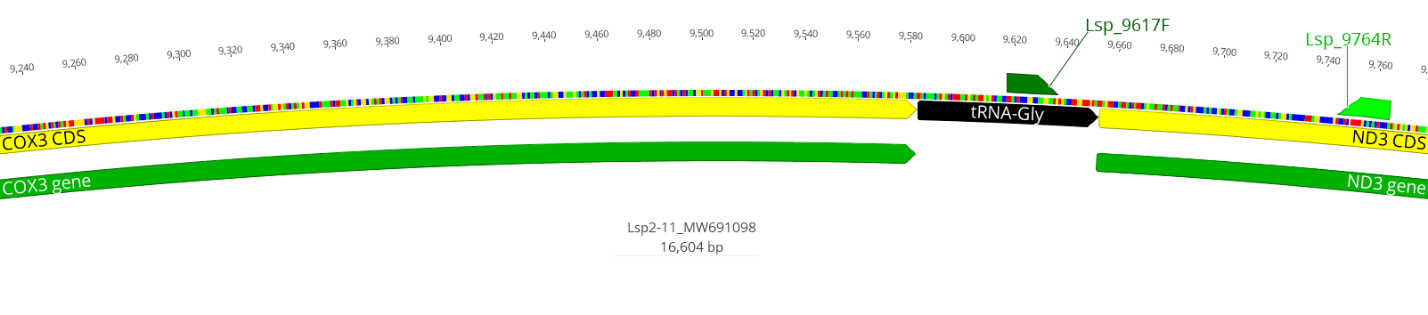


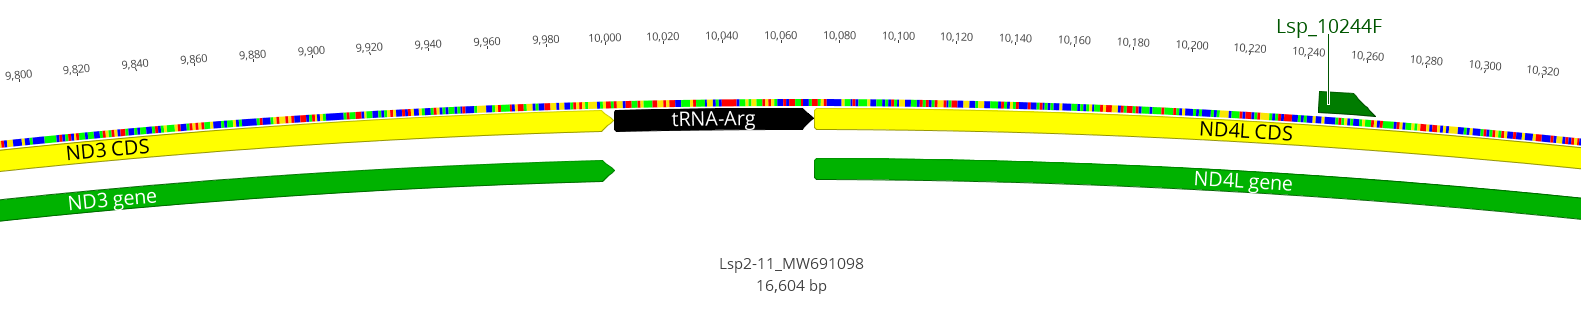


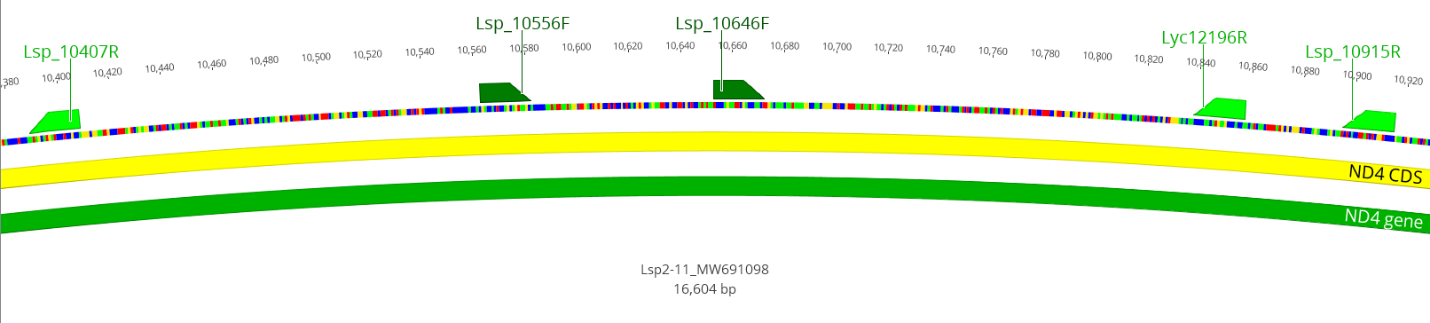


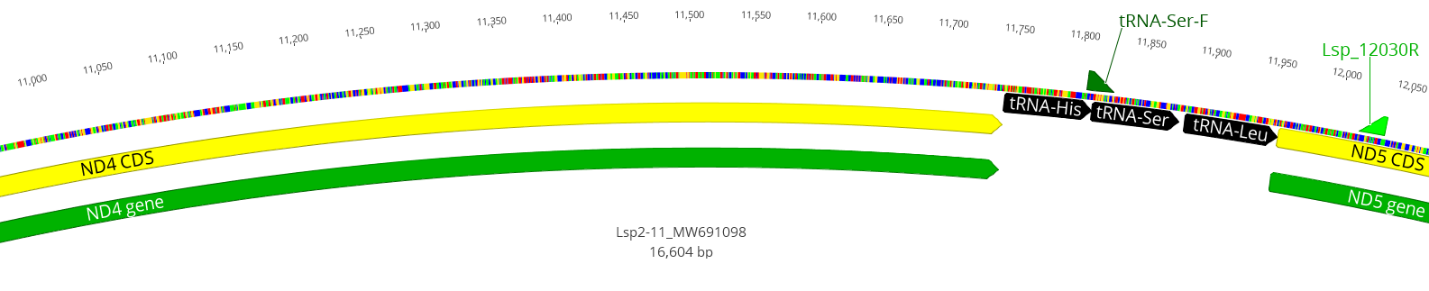


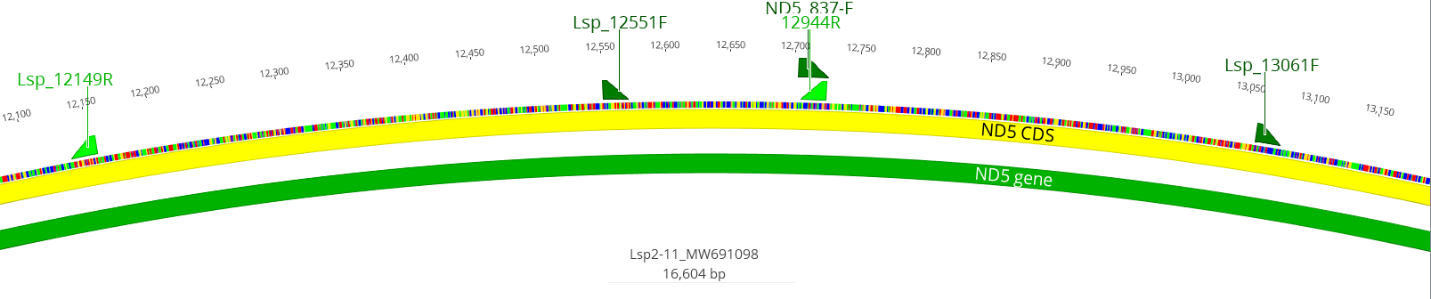


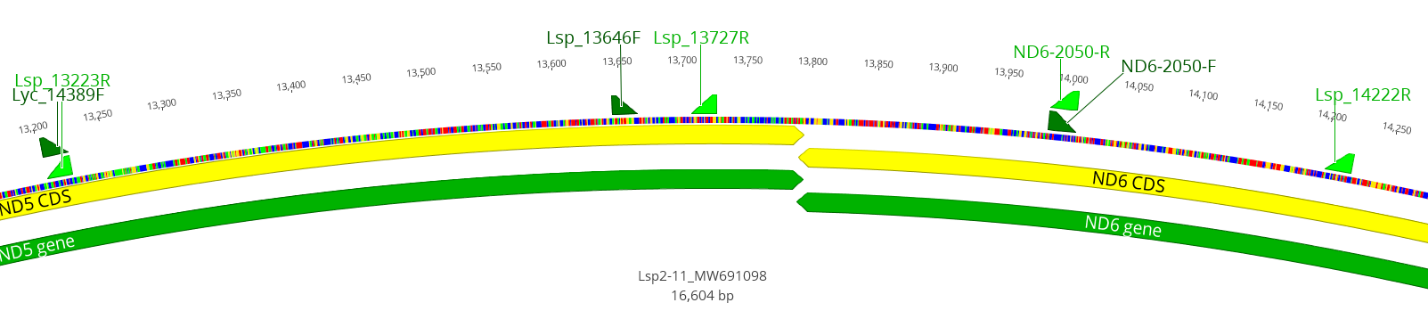


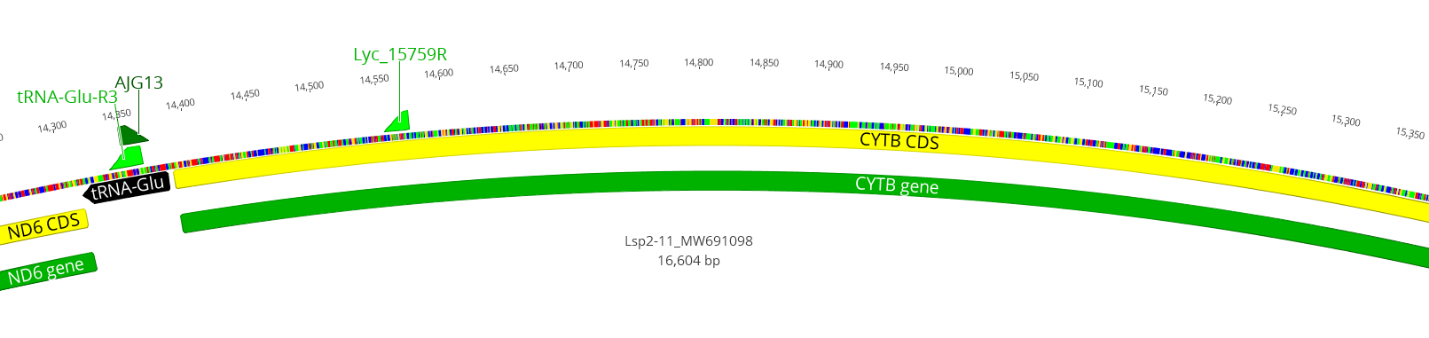


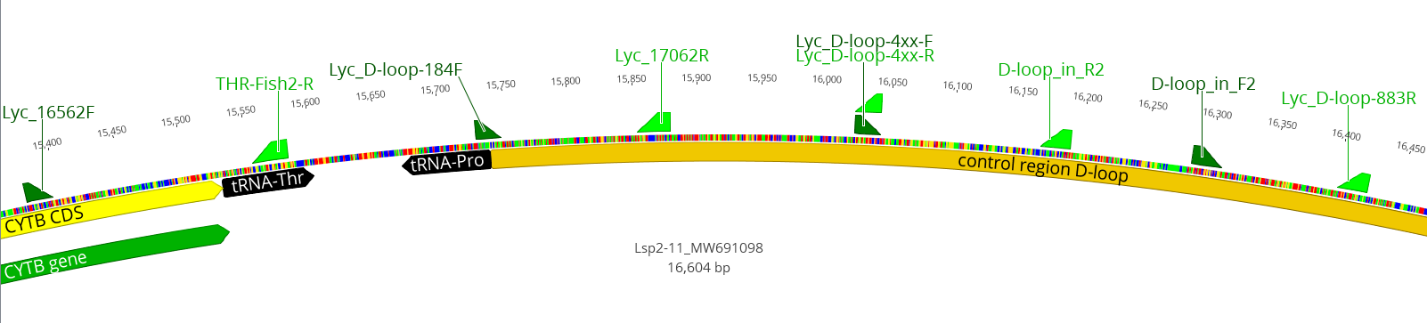


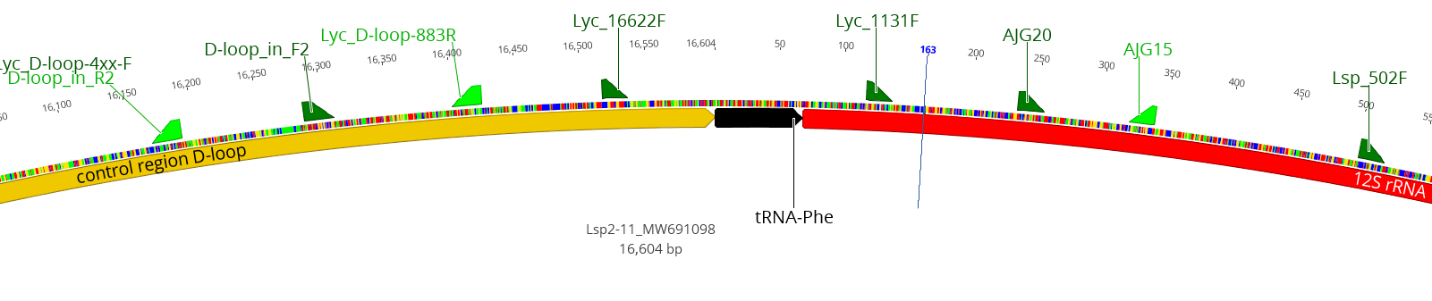

Supplement: Supplementary file 2 [file 84985d0311de0d853200f719.docx]
